# Supplementary material
Source: MDPI journal article supplement (https://www.mdpi.com/1873-149X/28/3/23)
Supplement: s1 [file s1]

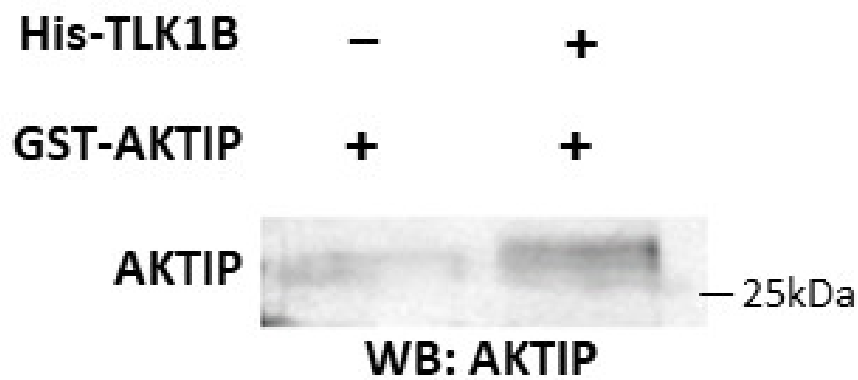

(a)

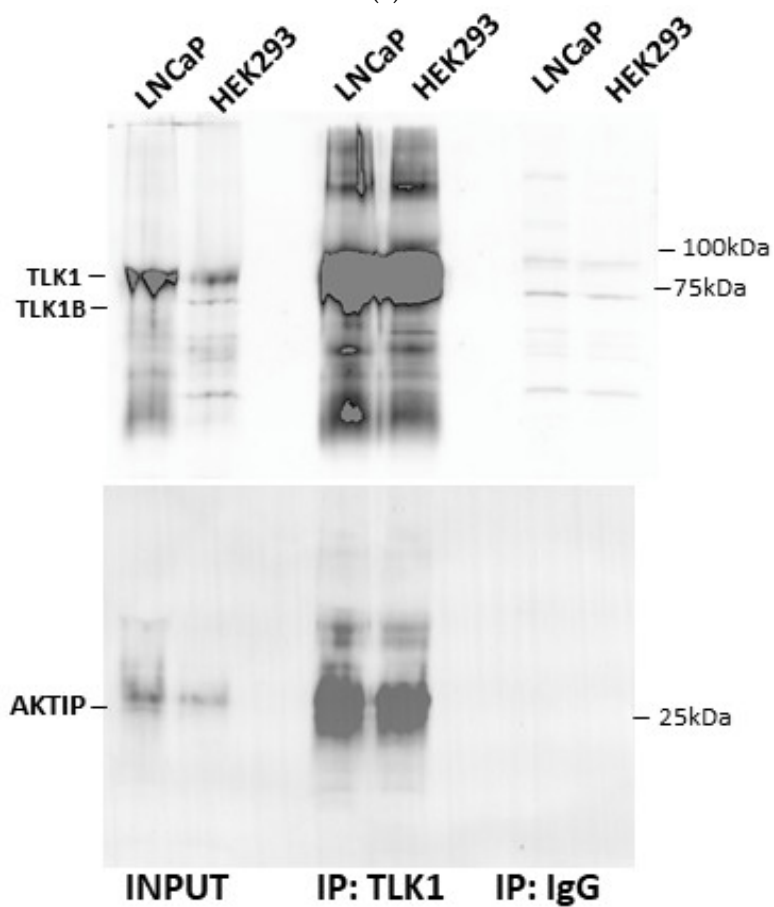

(b)

**Figure S1.** TLK1 and AKTIP interaction. **(a)** In vitro pull-down of recombinant His-TLK1B and GST-AKTIP isolated on Ni-NTA Sepharose and immunoblotting of AKTIP. **(b)** Co-IP of TLK1 from HEK 293 and LNCaP cell lysates using TLK1 specific antibody and immunoblotting for both TLK1/1B (upper panel) and AKTIP (lower panel).
